# Supplementary material
Source: PubMed Central journal article supplement (PMC3022145)
Supplement: NIHMS254447-supplement-Supp_Fig_1.pdf [file NIHMS254447-supplement-Supp_Fig_1.pdf]

**CHEMBIOCHEM**

## Supporting Information

© Copyright Wiley-VCH Verlag GmbH & Co. KGaA, 69451 Weinheim, 2008

# Supporting Information

for

## Surface-Induced Regulation of Podosome Organization and Dynamics in Cultured Osteoclasts

Dafna Geblinger, Benjamin Geiger, and Lia Addadi\*

**Supporting Movies 1-3.** Time-lapse movies of osteoclasts taken on bone (movie 1), calcite (movie 2) and glass (movie 3). From these movies were taken the frames composing figure 5. The movies are shown without manipulation. Frequency: 1 frame/minute for 450 min. Scale: 10  $\mu\text{m}$ .

**Supporting Movies 4-6.** Time-lapse movies of osteoclasts taken on bone (movie 4), calcite (movie 5) and glass (movie 6). From these movies were taken the frames composing figure 6. The movies are shown without manipulation. Frequency: 1 frame/minute for 450 min. Scale: 10  $\mu\text{m}$ .

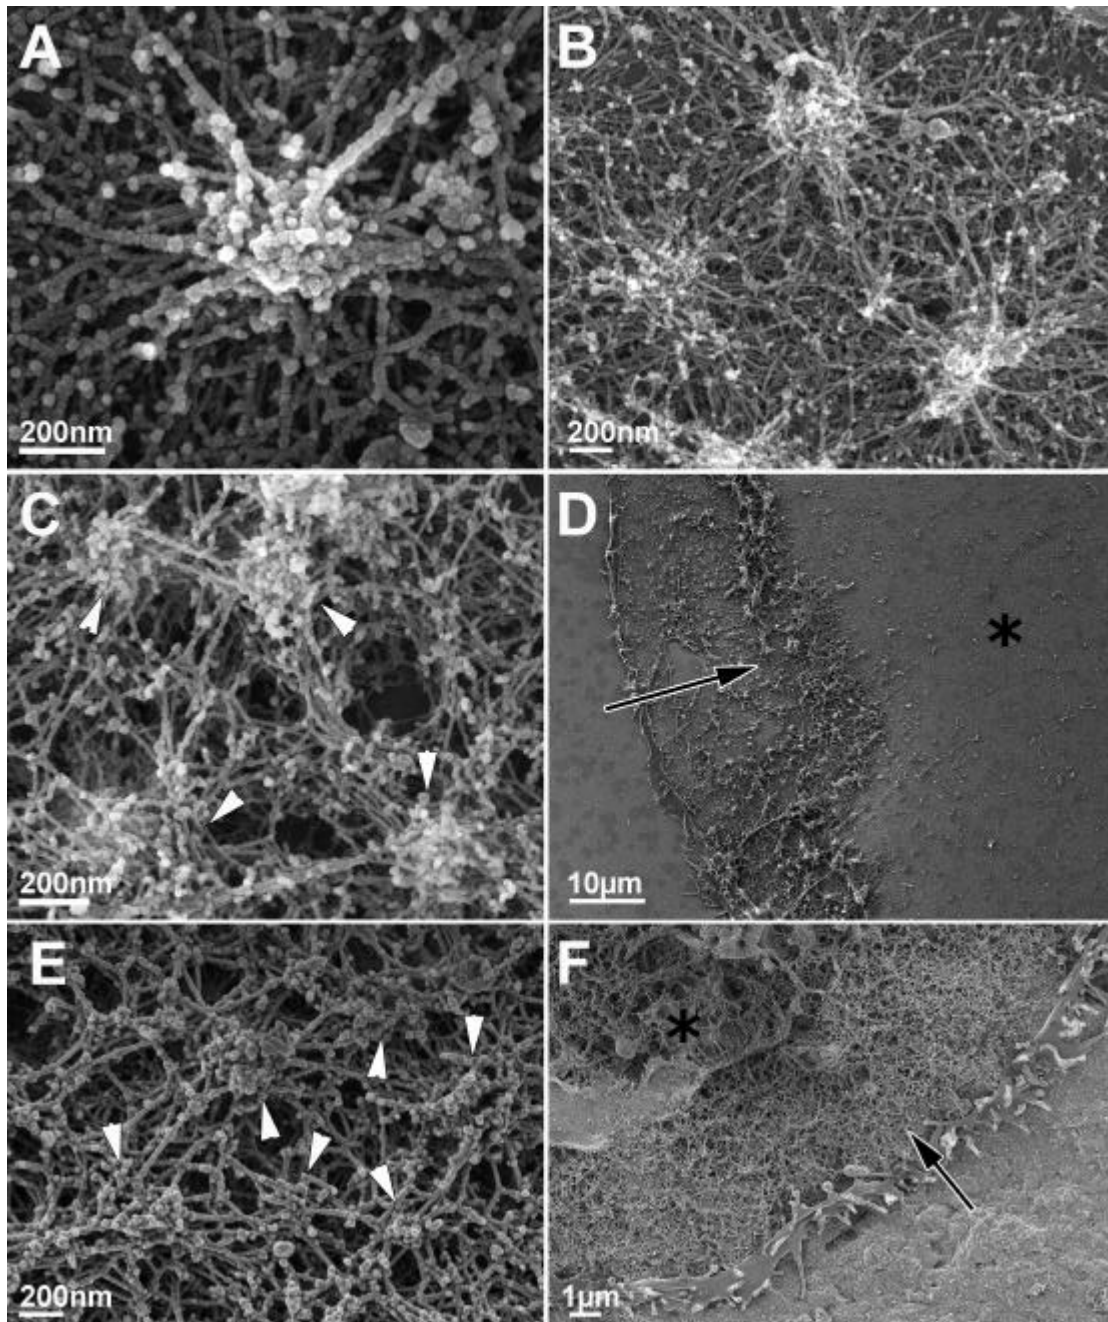

**Figure S1.** A)-D) Ventral membrane of osteoclast on glass. A) Individual podosome. B) Podosome cluster. C) Sealing zone-like structure. Notice that this structure is built of podosomes (arrows). D) Ventral membrane covering a large part of a cell. E) Sealing zone on bone. Notice that this structure, too, is built of podosomes (arrows). F) Ventral membrane of a cell on bone. The structures of podosomes and podosome clusters are essentially the same on glass, calcite, and bone. The sealing zones and sealing zone-like structures are marked by arrows, and the ruffled border, by asterisks.
